# Supplementary material for: Insertion sequence AS5 (ISAS5) is involved in the genomic plasticity of Aeromonas salmonicida
Source: PubMed Central journal article supplement — Mob Genet Elements. 2013 Jul 8;3(3):e25640. doi: 10.4161/mge.25640 (PMC3742599; doi:10.4161/mge.25640), 2013-07-08
Supplement: mge-3-e25640-s01.pdf [file mge-3-e25640-s01.pdf]

## **Supplemental Material to:**

**Mélanie V. Trudel, Katherine H. Tanaka, Geneviève Filion,  
Rana K. Daher, Michel Frenette and Steve J. Charette**

**Insertion sequence *AS5* (ISAS5) is involved  
in the genomic plasticity of *Aeromonas salmonicida***

**Mobile Genetic Elements 2013; 3(3); eLocation ID: e25640  
<http://dx.doi.org/10.4161/mge.25640>**

**<http://www.landesbioscience.com/journals/mge/article/25640>**

1 **Supplementary table 1. *A. salmonicida* strains used in this study**

| Name      | Origin <sup>a</sup>          | Source and/or reference <sup>b</sup> |
|-----------|------------------------------|--------------------------------------|
| 01-B522   | Brook trout (QC, Canada)     | FMVUM <sup>1</sup>                   |
| 01-B526   | Brook trout (QC, Canada)     | FMVUM <sup>2</sup>                   |
| 01-B516   | Brook trout (QC, Canada)     | FMVUM <sup>1</sup>                   |
| HER1098   | * (USA)                      | FHRC <sup>3</sup>                    |
| HER1110   | * (Japan)                    | FHRC <sup>4</sup>                    |
| HER1108   | * (Denmark)                  | FHRC <sup>4</sup>                    |
| HER1104   | * (France)                   | FHRC                                 |
| HER1085   | *                            | FHRC                                 |
| HER1084   | * (France)                   | FHRC <sup>4</sup>                    |
| HER1107   | *                            | FHRC                                 |
| A449      | Brown trout (France)         |                                      |
| 07-9324   | Brook trout (QC, Canada)     | FMVUM                                |
| 07-7817   | * (QC, Canada)               | FMVUM                                |
| 07-7346   | Atlantic salmon (QC, Canada) | FMVUM                                |
| 07-5957   | Atlantic salmon (QC, Canada) | FMVUM                                |
| 08-2647   | Brook trout (QC, Canada)     | FMVUM                                |
| 09-0167   | Atlantic salmon (QC, Canada) | FMVUM                                |
| 07-7287   | Brook trout (QC, Canada)     | FMVUM                                |
| 08-2783   | Brook trout (QC, Canada)     | FMVUM                                |
| 08-4188   | Brook trout (QC, Canada)     | FMVUM                                |
| 5093-3    | Brook trout (QC, Canada)     | MAPAQ                                |
| 5093-4    | Brook trout (QC, Canada)     | MAPAQ                                |
| 5490-1    | Brook trout (QC, Canada)     | MAPAQ                                |
| 5490-2    | Brook trout (QC, Canada)     | MAPAQ                                |
| 5490-4    | Brook trout (QC, Canada)     | MAPAQ                                |
| 5490-5    | Brook trout (QC, Canada)     | MAPAQ                                |
| 5704-1    | Brook trout (QC, Canada)     | MAPAQ                                |
| 5704-2    | Brook trout (QC, Canada)     | MAPAQ                                |
| 5704-4    | Brook trout (QC, Canada)     | MAPAQ                                |
| 5704-5    | Brook trout (QC, Canada)     | MAPAQ                                |
| 5704-6    | Brook trout (QC, Canada)     | MAPAQ                                |
| 5704-3    | Brook trout (QC, Canada)     | MAPAQ                                |
| m17524-09 | Brook trout (QC, Canada)     | FMVUM                                |
| m14349-09 | Atlantic salmon (QC, Canada) | FMVUM                                |
| m23281-09 | Brook trout (QC, Canada)     | FMVUM                                |
| m23067-09 | Brook trout (QC, Canada)     | FMVUM                                |
| m19438-09 | Brook trout (QC, Canada)     | FMVUM                                |
| m16583-09 | Brook trout (QC, Canada)     | FMVUM                                |
| m14231-09 | Atlantic salmon (QC, Canada) | FMVUM                                |
| m11743-09 | Brook trout (QC, Canada)     | FMVUM                                |
| m11431-09 | Brook trout (QC, Canada)     | FMVUM                                |
| m10419-09 | Brook trout (QC, Canada)     | FMVUM                                |
| m9906-09  | Brook trout (QC, Canada)     | FMVUM                                |
| m9954-10  | Brook trout (QC, Canada)     | FMVUM                                |
| m8029-10  | Brook trout (QC, Canada)     | FMVUM                                |
| m11603-10 | Brook trout (QC, Canada)     | FMVUM                                |

|             |                              |       |
|-------------|------------------------------|-------|
| m6363-10    | Brook trout (QC, Canada)     | FMVUM |
| m9221-10    | Brook trout (QC, Canada)     | FMVUM |
| 2009-178K9  | Atlantic salmon (NB, Canada) | FOC   |
| 2009-157K5  | Brook trout (NB, Canada)     | FOC   |
| 2010-47K18  | Brook trout (NB, Canada)     | FOC   |
| 2004-05MF26 | * (NB, Canada)               | FOC   |
| 2004-68K52  | Atlantic salmon (NS, Canada) | FOC   |
| 2009-195K29 | Brook trout (NB, Canada)     | FOC   |
| 2005-70     | * (NB, Canada)               | FOC   |
| 2009-144K3  | Brook trout (NB, Canada)     | FOC   |
| 2005-175K2  | Brook trout (NB, Canada)     | FOC   |
| 2004-208    | *                            | FOC   |
| M10935-11   | Brook trout (QC, Canada)     | FMVUM |
| M15448-11   | Brook trout (QC, Canada)     | FMVUM |
| M16474-11   | Brook trout (QC, Canada)     | FMVUM |
| M19878-11   | Brook trout (QC, Canada)     | FMVUM |
| M11500-11   | Brook trout (QC, Canada)     | FMVUM |
| M16486-11   | Brook trout (QC, Canada)     | FMVUM |
| M13460-11   | Brook trout (QC, Canada)     | FMVUM |
| M13729-11   | Brook trout (QC, Canada)     | FMVUM |
| M14481-11   | Brook trout (QC, Canada)     | FMVUM |
| M15879-11   | Brook trout (QC, Canada)     | FMVUM |
| M17739-11   | Brook trout (QC, Canada)     | FMVUM |
| M13732-11   | Brook trout (QC, Canada)     | FMVUM |
| M17053-11   | Brook trout (QC, Canada)     | FMVUM |
| M15878-11   | Rainbow trout (QC, Canada)   | FMVUM |
| M13182-11   | Atlantic salmon (QC, Canada) | FMVUM |
| M17735-11   | Brook trout (QC, Canada)     | FMVUM |
| M15576-11   | Brown trout (QC, Canada)     | FMVUM |
| M22710-11   | Brook trout (QC, Canada)     | FMVUM |
| M13764-11   | Brook trout (QC, Canada)     | FMVUM |
| M23911-11   | Brook trout (QC, Canada)     | FMVUM |

- 2 a. \*: Further information not known or not traceable.
- 3 b. FMVUM: Laboratoire de bactériologie clinique, Faculté de médecine vétérinaire, Université de
- 4 Montréal (Montreal, QC, Canada); FHRC: Félix d'Hérelle Reference Center, Département de
- 5 biochimie, de microbiologie et de bio-informatique, Université Laval (Quebec City, QC, Canada);
- 6 MAPAQ: Ministère de l'Agriculture, des Pêcheries et de l'Alimentation du Québec; FOC: Aquatic
- 7 Animal Health Department, Fisheries and Oceans Canada (NB, Canada); NB: New Brunswick;
- 8 NS: Nova Scotia; QC: Quebec.
- 9

## References

1. Daher RK, Fillion G, Tan SG, Dallaire-Dufresne S, Paquet VE, Charette SJ. Alteration of virulence factors and rearrangement of pAsa5 plasmid caused by the growth of *Aeromonas salmonicida* in stressful conditions. *Vet Microbiol* 2011; 152:353-60; PMID:21621930; <http://dx.doi.org/10.1016/j.vetmic.2011.04.034>
2. Dziewit L, Baj J, Szuplewska M, Maj A, Tabin M, Czyzkowska A, et al. Insights into the transposable mobilome of *Paracoccus* spp. (*Alphaproteobacteria*). *PLoS One* 2012; 7:e32277; PMID:22359677; <http://dx.doi.org/10.1371/journal.pone.0032277>
3. Udey R. Pathogenic, antigenic, and immunogenic properties of *Aeromonas salmonicida* studied in juvenile Coho salmon (*Oncorhynchus kisutch*). Corvallis, OR: Ph. D. thesis. Oregon State University, 1978
4. Shore AC, Brennan OM, Ehricht R, Monecke S, Schwarz S, Slickers P, et al. Identification and characterization of the multidrug resistance gene *cfr* in a Panton-Valentine leukocidin-positive sequence type 8 methicillin-resistant *Staphylococcus aureus* IVa (USA300) isolate. *Antimicrob Agents Chemother* 2010; 54:4978-84; PMID:20921317; <http://dx.doi.org/10.1128/AAC.01113-10>
5. Ebanks RO, Knickle LC, Goguen M, Boyd JM, Pinto DM, Reith M, et al. Expression of and secretion through the *Aeromonas salmonicida* type III secretion system. *Microbiology* 2006; 152:1275-86; PMID:16622045; <http://dx.doi.org/10.1099/mic.0.28485-0>
